# Supplementary material for: Assessing Biases in Medical Decisions via Clinician and AI Chatbot Responses to Patient Vignettes
Source: PubMed Central journal article supplement (PMC10582782; doi:10.1001/jamanetworkopen.2023.38050), 2023-10-17
Supplement: jamanetwopen-e2338050-s002.pdf [file jamanetwopen-e2338050-s002.pdf]

## Data Sharing Statement

Kim. Assessing Biases in Medical Decisions via Clinician and AI Chatbot Responses to Patient Vignettes. *JAMA Netw Open*. Published October 17, 2023.

doi:10.1001/jamanetworkopen.2023.38050

### Data

**Data available:** Yes

**Data types:** Other (please specify)

**Additional Information:** will be in supplement. The authors are willing to share the full result table, which presents 19 vignettes, questions, and answers of the AI chatbots and clinicians from the 8 original studies, with those who make a reasonable request.

**How to access data:** will be in supplement

**When available:** With publication

### Supporting Documents

**Document types:** None

### Additional Information

**Who can access the data:** HTML files from chatgpt will be shared as supplement

**Types of analyses:** HTML files from chatgpt will be shared as supplement

**Mechanisms of data availability:** HTML files from chatgpt will be shared as supplement

**Any additional restrictions:** none
